# Supplementary material
Source: PubMed Central journal article supplement (PMC2982261)
Supplement: NIHMS237351-supplement-supplement_1.pdf [file NIHMS237351-supplement-supplement_1.pdf]

**Supplementary Table 1. Conventional cytogenetics**

| <b>Case n°</b> | <b>Site</b>      | <b>Karyotype</b>                                                                                                                                                                               |
|----------------|------------------|------------------------------------------------------------------------------------------------------------------------------------------------------------------------------------------------|
| 21             | Thyroid gland    | 47, XY, del(1)(?p13p22), +7, t(8;14)(q24;q32), der(16)t(1;16)(q21;q22), add(21)(?p11)                                                                                                          |
| 33*            | Soft tissue      | 46, X, -Y, t(2;8)(p12;q24.1), -4, der(6)t(5;6)(p12;q25), +7, +15, der(15;17)(q10;q10), +20[6] / 46, XY[14]                                                                                     |
| 36*            | Pleural effusion | 83-85,XX,-Y, +1, der(1)t(1;1)(p32;q25), +2, +3, +4, +6, del(6)(q25)x2, +7, +7, t(8;14)(q24.1;q32)x2, +10, +12, add(13)(q34), +16, psu dic(16;1)(q12;p13), +17, +18, +19, +20, +22, +mar [cp20] |

\* Cases previously reported [12]
